# Supplementary material for: MONITOR-IC study, a mixed methods prospective multicentre controlled cohort study assessing 5-year outcomes of ICU survivors and related healthcare costs: a study protocol
Source: PubMed Central journal article supplement — BMJ Open. 2017 Nov 14;7(11):e018006. doi: 10.1136/bmjopen-2017-018006 (PMC5695418; doi:10.1136/bmjopen-2017-018006), 2017-11-14
Supplement: bmjopen-2017-018006supp001.pdf [file bmjopen-2017-018006supp001.pdf]

## Supplementary 1 Overview of validated instruments

| Item                                      | Questionnaire                                                                         | Questions | Domains                                                                                                                                                                                                                                                                                                                                                                                                                                                                              | Score                                                                                                                                                                                                                                                                                        |
|-------------------------------------------|---------------------------------------------------------------------------------------|-----------|--------------------------------------------------------------------------------------------------------------------------------------------------------------------------------------------------------------------------------------------------------------------------------------------------------------------------------------------------------------------------------------------------------------------------------------------------------------------------------------|----------------------------------------------------------------------------------------------------------------------------------------------------------------------------------------------------------------------------------------------------------------------------------------------|
| Health status and related quality of life | SF-36 (Short Form Health Survey) <sup>39</sup>                                        | 36        | <ol style="list-style-type: none"> <li>1. Physical functioning (10 items)</li> <li>2. Role limitations because of physical health problems (4 items)</li> <li>3. Bodily pain (2 items)</li> <li>4. Social functioning (2 items)</li> <li>5. General mental health (5 items)</li> <li>6. Role limitations because of emotional problems (3 items)</li> <li>7. Vitality (4 items)</li> <li>8. General health perceptions (5 items)</li> </ol> <p>Change in general health (1 item)</p> | 35 of the 36 items are used for the calculation of the eight domain scores and two summary scores: the physical component summary (PCS) and mental component summary (MCS) scores. Each domain is scored from 0 (worst score) to 100 (best score). The lower the score, the more disability. |
|                                           | EQ-5D-5L <sup>40</sup>                                                                | 5         | <ol style="list-style-type: none"> <li>1. Mobility (1 item)</li> <li>2. Self-care (1 item)</li> <li>3. Usual activities (1 item)</li> <li>4. Pain and discomfort (1 item)</li> <li>5. Anxiety and depression (1 item)</li> </ol> <p>The EQ-5D-5L also comprises a visual analogue scale (VAS) to record perceptions of the participants own current overall health.</p>                                                                                                              | <p>Each domain is scored on a five point scale.</p> <p>The range of the VAS scale is from 0 to 100.</p>                                                                                                                                                                                      |
| Physical impairments                      | CFS (Clinical Frailty Score) <sup>42</sup>                                            | 1         | Frailty (1 item)                                                                                                                                                                                                                                                                                                                                                                                                                                                                     | One 9-point scale ranging from 1 'Very fit' to 9 'Terminally ill'.                                                                                                                                                                                                                           |
|                                           | CIS-8 (Subscale of the Checklist Individual Strength, CIS-20) <sup>45</sup>           | 8         | Fatigue (8 items)                                                                                                                                                                                                                                                                                                                                                                                                                                                                    | <p>A 7 point scale, ranging from 'No that is not right' (1) to 'Yes that is right' (7).</p> <p>A total sum score of 35 or more indicates sever fatigue.</p>                                                                                                                                  |
| Cognitive impairments                     | CFQ-14 (Abbreviated versions of the Cognitive Failure Questionnaire) <sup>47 48</sup> | 14        | <ol style="list-style-type: none"> <li>1.Memory (4 items)</li> <li>2.Distractibility (5 items)</li> <li>3.Social blunders (4 items)</li> <li>4.Names (1 item)</li> </ol>                                                                                                                                                                                                                                                                                                             | Each item is scored on a 5 point sale, ranging from 0 (never) to 4 (very often). A total sum is calculated and a higher score indicates more cognitive failure.                                                                                                                              |
| Mental impairments                        | HADS (Hospital Anxiety and Depression Scale) <sup>49</sup>                            | 14        | <ol style="list-style-type: none"> <li>1. Anxiety (HADS-A) (7 items)</li> <li>2. Depression (HADS-D) (7 items)</li> </ol>                                                                                                                                                                                                                                                                                                                                                            | Each item on the questionnaire is scored on a 4-point scale, ranging from 0-3. Scores range between 0 and 21 for depression and for anxiety. Higher scores indicate higher symptom frequencies: 0-7 is normal, 8-10 is mild, 11-14 is moderate and 15-21 is severe.                          |
|                                           | IES-R (Impact of Event Scale Revised) <sup>50</sup>                                   | 22        | Subjective stress, caused by traumatic events                                                                                                                                                                                                                                                                                                                                                                                                                                        | This lists consists of 22 questions, with a 5-point scale ranging from 0 (not at all) to 4 (extremely). Total scores range from 0 to 88, with score of 33 or above as best cut off for a probable diagnosis of PTSD.                                                                         |
